# Supplementary material
Source: PubMed Central journal article supplement (PMC4152774)
Supplement: NIHMS612893-supplement-17.pdf [file NIHMS612893-supplement-17.pdf]

| Source of variability                                                    | Correction Method                                                                                                                                                                                                                                                                                                                                                                                                                                                             |
|--------------------------------------------------------------------------|-------------------------------------------------------------------------------------------------------------------------------------------------------------------------------------------------------------------------------------------------------------------------------------------------------------------------------------------------------------------------------------------------------------------------------------------------------------------------------|
| 1. Section rotation and misalignment in the x (medial-lateral) axis      | Rotate and align individual thalamic mask sections using two hand-selected midline points along the center y (dorsal-ventral) axis.                                                                                                                                                                                                                                                                                                                                           |
| 2. Cutting angle tilt about the x axis (i.e. rotation around the x axis) | Cutting angle tilt relative to the ABA thalamus is estimated from the z (anterior-posterior) coordinates of: the anterior and posterior points of the corpus callosum along the midline, the medial posterior point of the anterior commissure, and the anterior dentate gyrus, as illustrated in <b>Supplementary Figure 5</b> . The tilt is corrected at step 3.                                                                                                            |
| 3. Misalignment along the y axis                                         | Multiple steps were involved. A) To control for the tilt about the x axis, the ABA thalamic mask is rotated to the tilt angle determined in step 2 and re-sampled as 50 $\mu\text{m}$ slices. B) The centers of mass of individual thalamic mask sections were aligned to the corresponding adjusted atlas coordinates. C.) The aligned thalamus is rotated back to correct for its tilt angle.                                                                               |
| 4. Cutting angle tilt about the y axis (i.e. rotation around the y axis) | The 3D thalamus mask is sheared to minimize left-right asymmetry. Unlike a pure rotation, this transformation preserved the midline locations in our coordinate system, which were determined by hand-selected points. The degree of shear correction is determined by measuring the left-right asymmetry between 0.7 mm-wide sagittal bands located 0.4 mm lateral to the midline.                                                                                           |
| 5. Overall size of the thalamus                                          | A) Each 3D thalamic mask was scaled in z so that the distance along the midline between 1% (anterior) and 99% (posterior) of the thalamus voxels in a 110 $\mu\text{m}$ sagittal band matched that of the ABA thalamus. B) The thalamus is scaled isotropically in x-y based on matching the central volume (0.8 mm thick in the A-P axis) to the corresponding ABA thalamus volume. C) The thalamus is scaled in x (medial-lateral) to the widest point of the ABA thalamus. |

**Supplementary Table 1** Correction methods for brain-to-brain variability.
